# Supplementary material for: Study of structural and dynamic characteristics of copper(ii) amino acid complexes in solutions by combined EPR and NMR relaxation methods
Source: Royal Society of Chemistry journal article supplement (doi:10.1039/c4cp00255e), 2014-01-01
Supplement: c4cp00255e1.pdf [file c4cp00255e1.pdf]

## Structural and dynamic characteristics of copper(II) amino acid complexes in solutions by combined EPR and NMR relaxation methods

Mikhail S. Bukharov, Valery G. Shtyrlin, Anvar Sh. Mukhtarov, Georgy V. Mamin, Siegfried Stapf, Carlos Mattea, Alexander A. Krutikov, Alexander N. Il'in, Nikita Yu. Serov

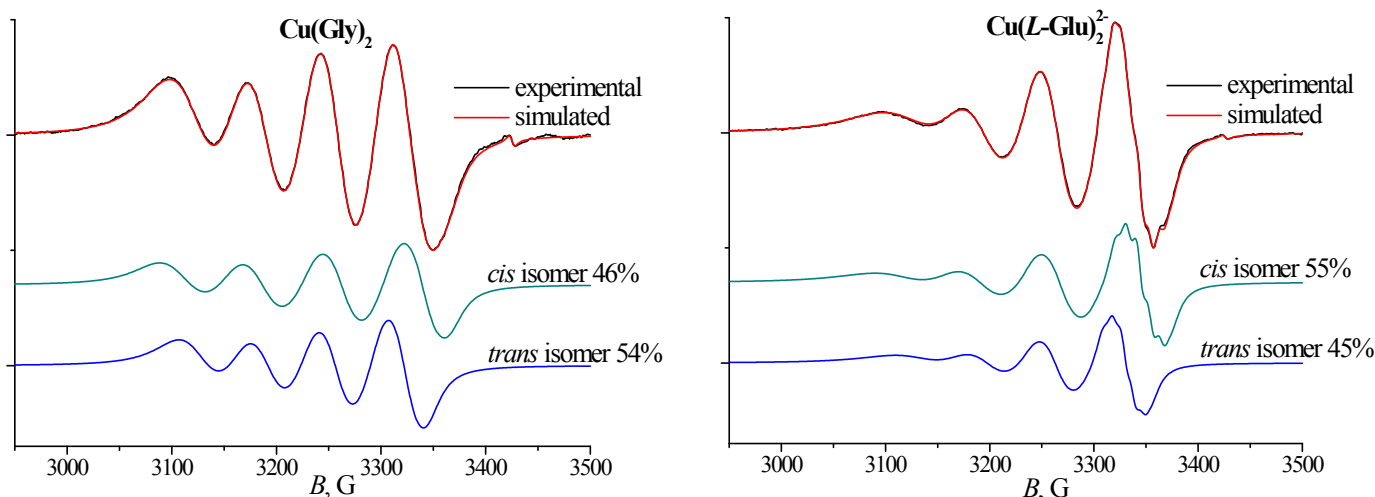

**Fig. 1S** Experimental and simulated EPR spectra of the  $\text{Cu}(\text{Gly})_2$  and  $\text{Cu}(\text{L-Glu})_2^{2-}$  complexes.

**Table 1S** EPR spectra parameters of the copper(II) complexes with amino acids at 295 (1.0 M  $\text{KNO}_3$ )

| Complex                           | $g_{\perp}$ | $g_{\parallel}$ | $g_0$  | $A_{\perp} / \text{G}$ | $A_{\parallel} / \text{G}$ | $A_0 / \text{G}$ | $\tau_R \cdot 10^{11} / \text{s}$ | $A_0^N / \text{G}$ | $P$<br>1.0 M $\text{KNO}_3$ |
|-----------------------------------|-------------|-----------------|--------|------------------------|----------------------------|------------------|-----------------------------------|--------------------|-----------------------------|
| $\text{Cu}(\text{Gly})_2$         |             |                 |        |                        |                            |                  |                                   |                    |                             |
| <i>trans</i> isomer               | 2.052       | 2.267           | 2.1285 | 15                     | 160                        | 63.4             | 3.4                               | 8.9                | 0.54                        |
| <i>cis</i> isomer                 | 2.052       | 2.267           | 2.1277 | 20                     | 180                        | 74.2             | 3.4                               | 10.5               | 0.46                        |
| $\text{Cu}(\text{D-Ala})_2$       |             |                 |        |                        |                            |                  |                                   |                    |                             |
| <i>trans</i> isomer               | 2.052       | 2.257           | 2.1252 | 15                     | 167                        | 64.2             | 4.2                               | 8.9                | 0.45                        |
| <i>cis</i> isomer                 | 2.052       | 2.257           | 2.1240 | 20                     | 180                        | 75.0             | 4.2                               | 10.5               | 0.55                        |
| $\text{Cu}(\text{D-Val})_2$       |             |                 |        |                        |                            |                  |                                   |                    |                             |
| <i>trans</i> isomer               | 2.055       | 2.257           | 2.1223 | 15                     | 163                        | 64.5             | 5.2                               | 8.6                | 0.51                        |
| <i>cis</i> isomer                 | 2.055       | 2.255           | 2.1207 | 20                     | 183                        | 74.4             | 5.2                               | 10.3               | 0.49                        |
| $\text{Cu}(\text{L-Ser})_2$       |             |                 |        |                        |                            |                  |                                   |                    |                             |
| <i>trans</i> isomer               | 2.057       | 2.266           | 2.1262 | 15                     | 167                        | 64.3             | 4.8                               | 8.9                | 0.51                        |
| <i>cis</i> isomer                 | 2.057       | 2.266           | 2.1262 | 20                     | 187                        | 75.5             | 4.8                               | 10.5               | 0.49                        |
| $\text{Cu}(\text{L-Asp})_2^{2-}$  |             |                 |        |                        |                            |                  |                                   |                    |                             |
| <i>trans</i> isomer               | 2.065       | 2.2481          | 2.1260 | 15                     | 144                        | 57.9             | 6.2                               | 9.4                | 0.40                        |
| <i>cis</i> isomer                 | 2.065       | 2.2483          | 2.1261 | 20                     | 174                        | 71.5             | 6.2                               | 10.2               | 0.60                        |
| $\text{Cu}(\text{L-Glu})_2^{2-}$  |             |                 |        |                        |                            |                  |                                   |                    |                             |
| <i>trans</i> isomer               | 2.056       | 2.2567          | 2.1229 | 14                     | 164                        | 63.9             | 7.8                               | 9.0                | 0.45                        |
| <i>cis</i> isomer                 | 2.056       | 2.2564          | 2.1228 | 20                     | 182                        | 74.0             | 7.8                               | 10.5               | 0.55                        |
| $\text{Cu}(\text{L-LysH})_2^{2+}$ |             |                 |        |                        |                            |                  |                                   |                    |                             |
| <i>trans</i> isomer               | 2.055       | 2.2552          | 2.1217 | 11                     | 166                        | 63.6             | 8.0                               | 8.7                | 0.46                        |
| <i>cis</i> isomer                 | 2.055       | 2.2572          | 2.1224 | 20                     | 183                        | 74.2             | 8.0                               | 10.7               | 0.54                        |
| $\text{Cu}(\text{L-Pro})_2$       |             |                 |        |                        |                            |                  |                                   |                    |                             |
| <i>trans</i> isomer               | 2.057       | 2.2523          | 2.1221 | 15                     | 161                        | 63.6             | 5.5                               | 9.3                | 0.49                        |
| <i>cis</i> isomer                 | 2.057       | 2.2511          | 2.1217 | 20                     | 183                        | 74.5             | 5.5                               | 10.7               | 0.51                        |
| $\text{Cu}(\text{Sar})_2$         |             |                 |        |                        |                            |                  |                                   |                    |                             |
| <i>trans</i> isomer               | 2.057       | 2.265           | 2.1264 | 15                     | 158                        | 63.7             | 4.4                               | 9.0                | 0.74                        |
| <i>cis</i> isomer                 | 2.057       | 2.274           | 2.1281 | 20                     | 176                        | 74.2             | 4.4                               | 9.5                | 0.26                        |

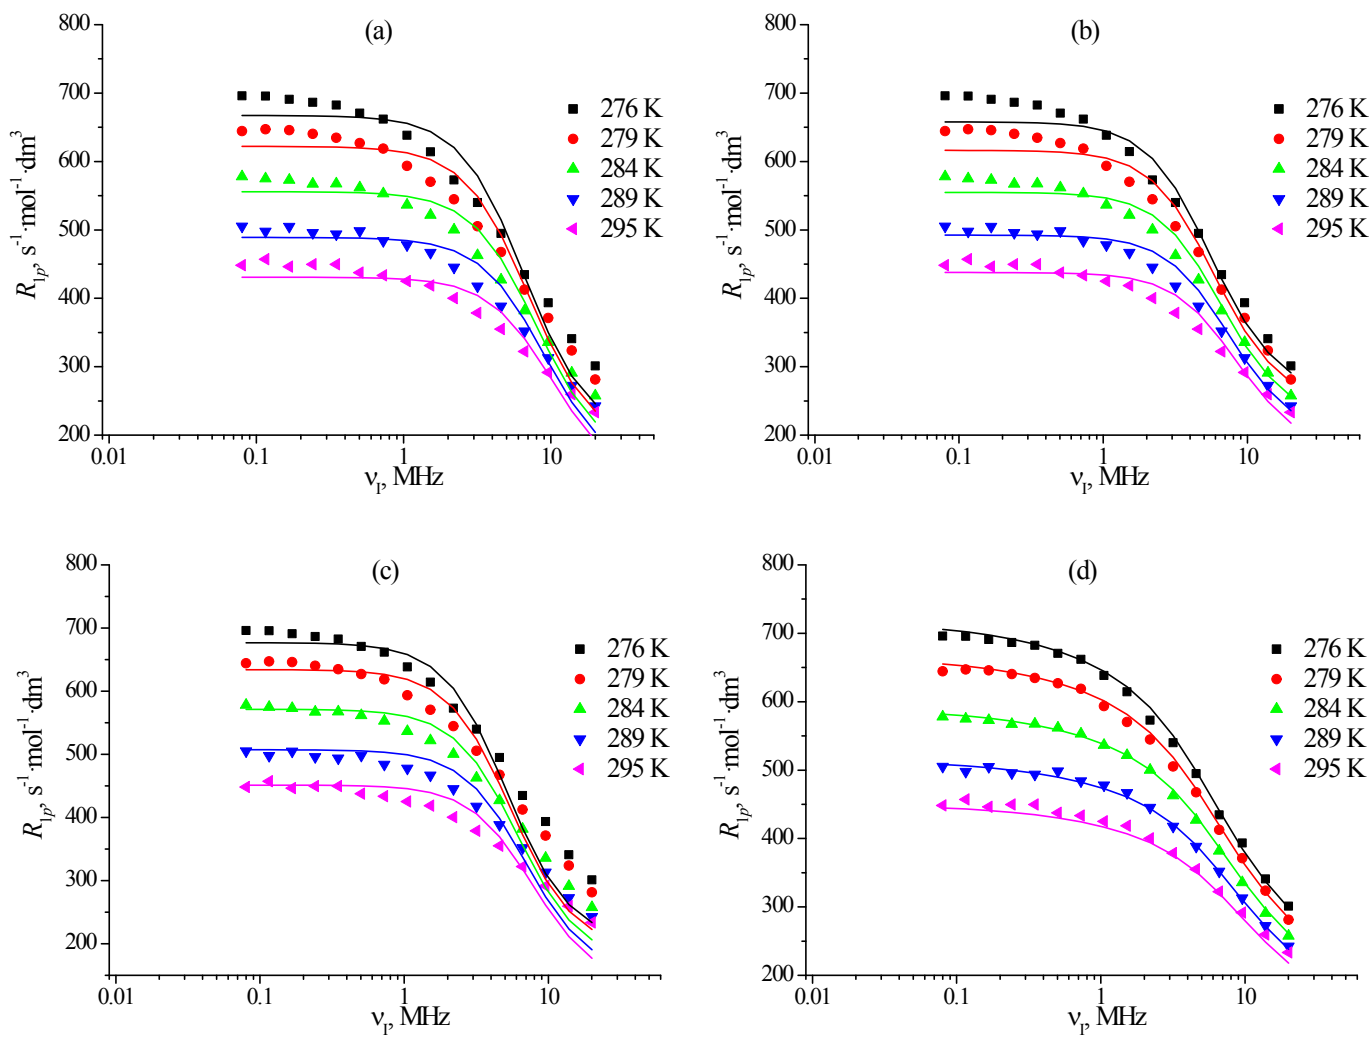

**Fig. 2S** Experimental (points) NMRD profiles for the  $\text{Cu}(\text{Gly})_2$  aqueous solution and simulated (lines) by different models: a) model 1: inner sphere, b) model 2: inner sphere + second sphere, c) model 3: inner sphere + rotational outer sphere, d) model 4: inner sphere + translational outer sphere ( $d = 3.03 \text{ \AA}$ ).

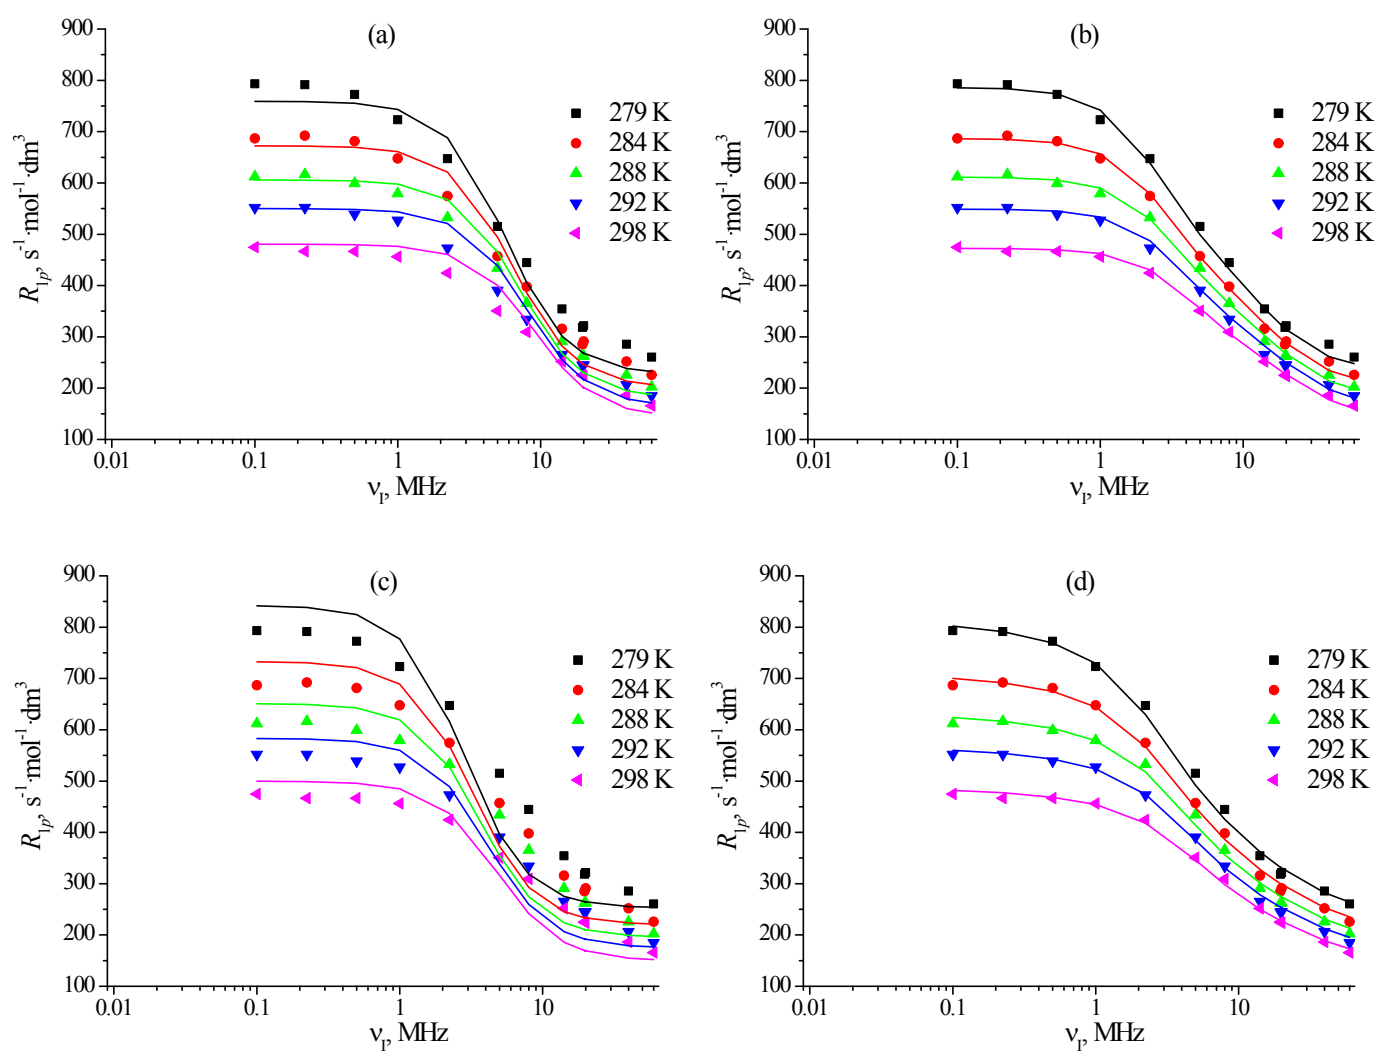

**Fig. 3S** Experimental (points) NMRD profiles for the  $\text{Cu}(\text{L-Glu})_2^{2-}$  aqueous solution and simulated (lines) by different models: a) model 1: inner sphere, b) model 2: inner sphere + second sphere, c) model 3: inner sphere + rotational outer sphere, d) model 4: inner sphere + translational outer-sphere ( $d = 2.98 \text{ \AA}$ ).

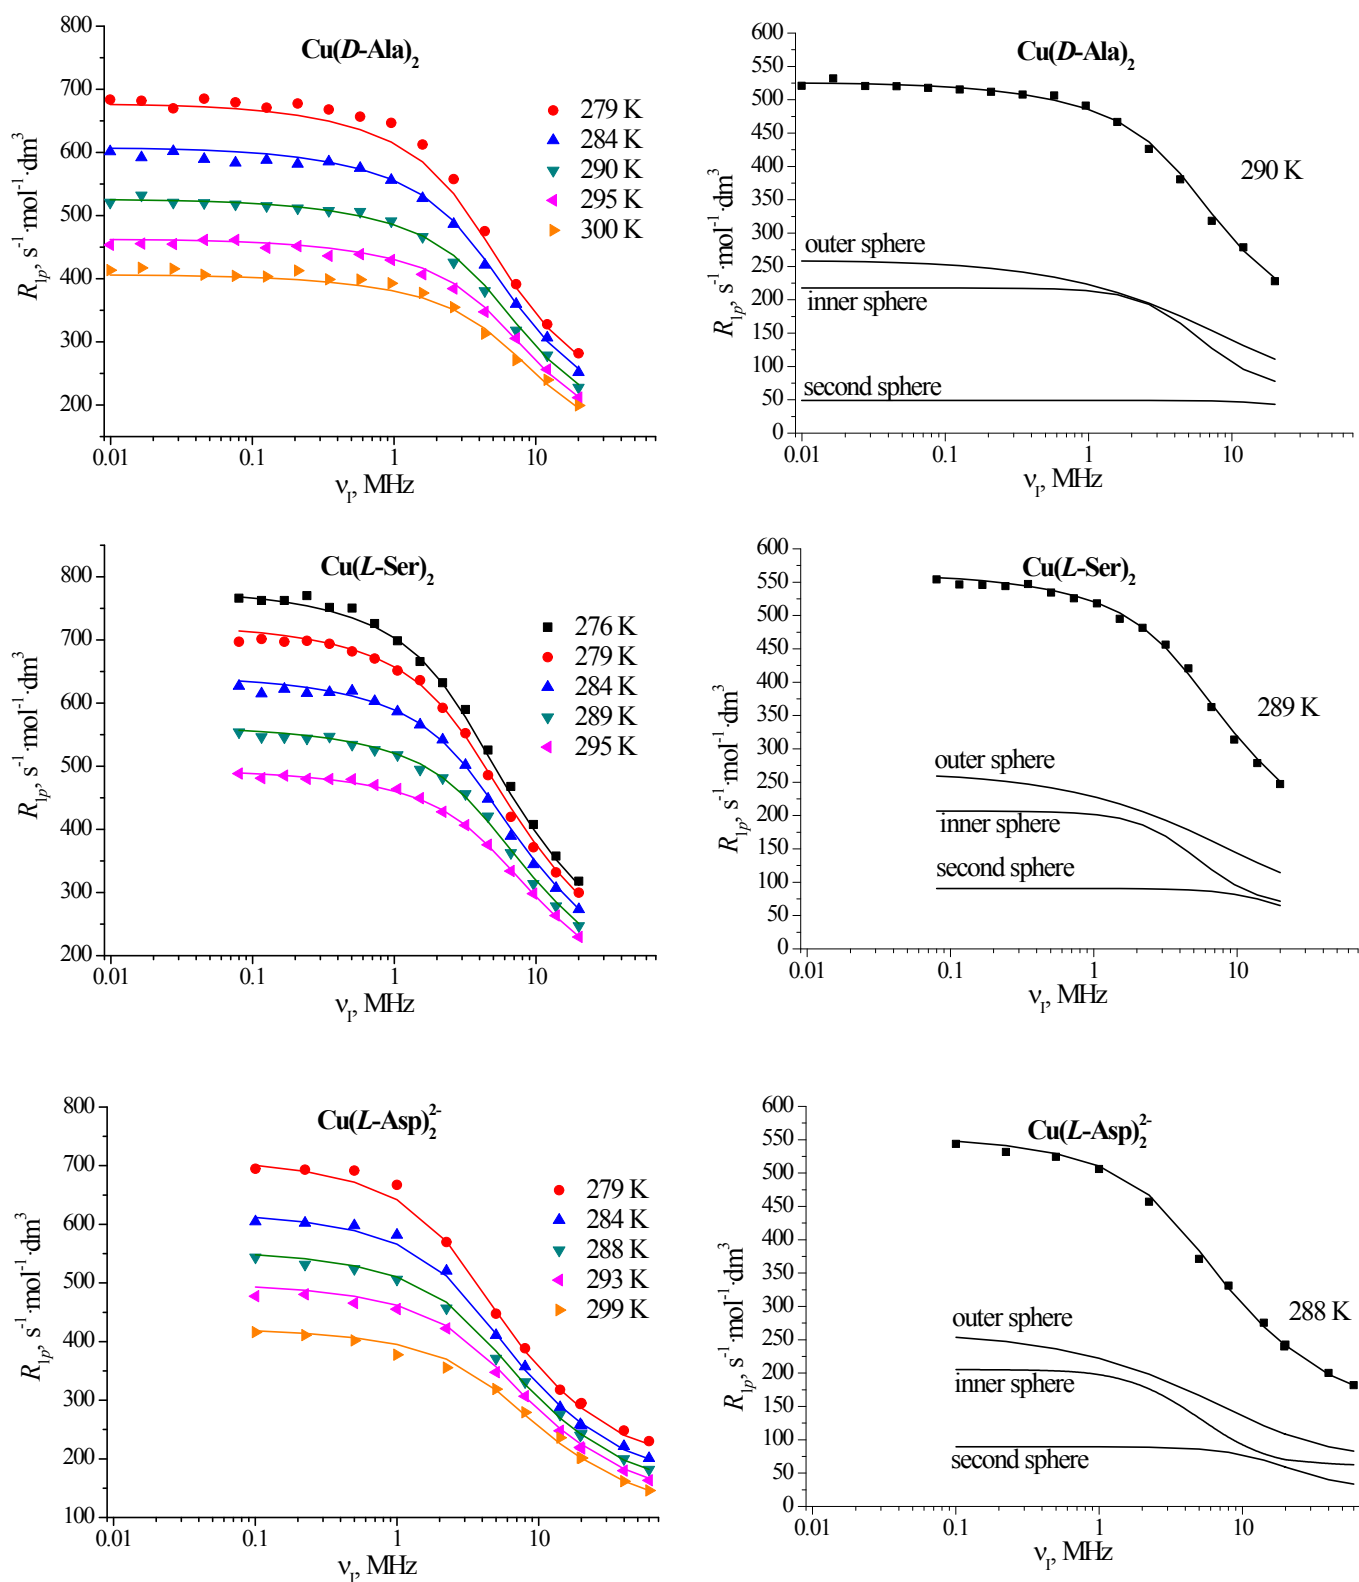

**Fig. 4S** Left column: experimental NMRD profiles (points) and their best simulations (lines); right column: experimental (points) and fitted (lines) NMRD profiles with different contributions. The abscissa is  $\nu_1 = \omega_l/2\pi$ .  $R_{1p} = T_{1p}^{-1}/C_M$  is the molar relaxivity, where  $C_M$  is the metal concentration.

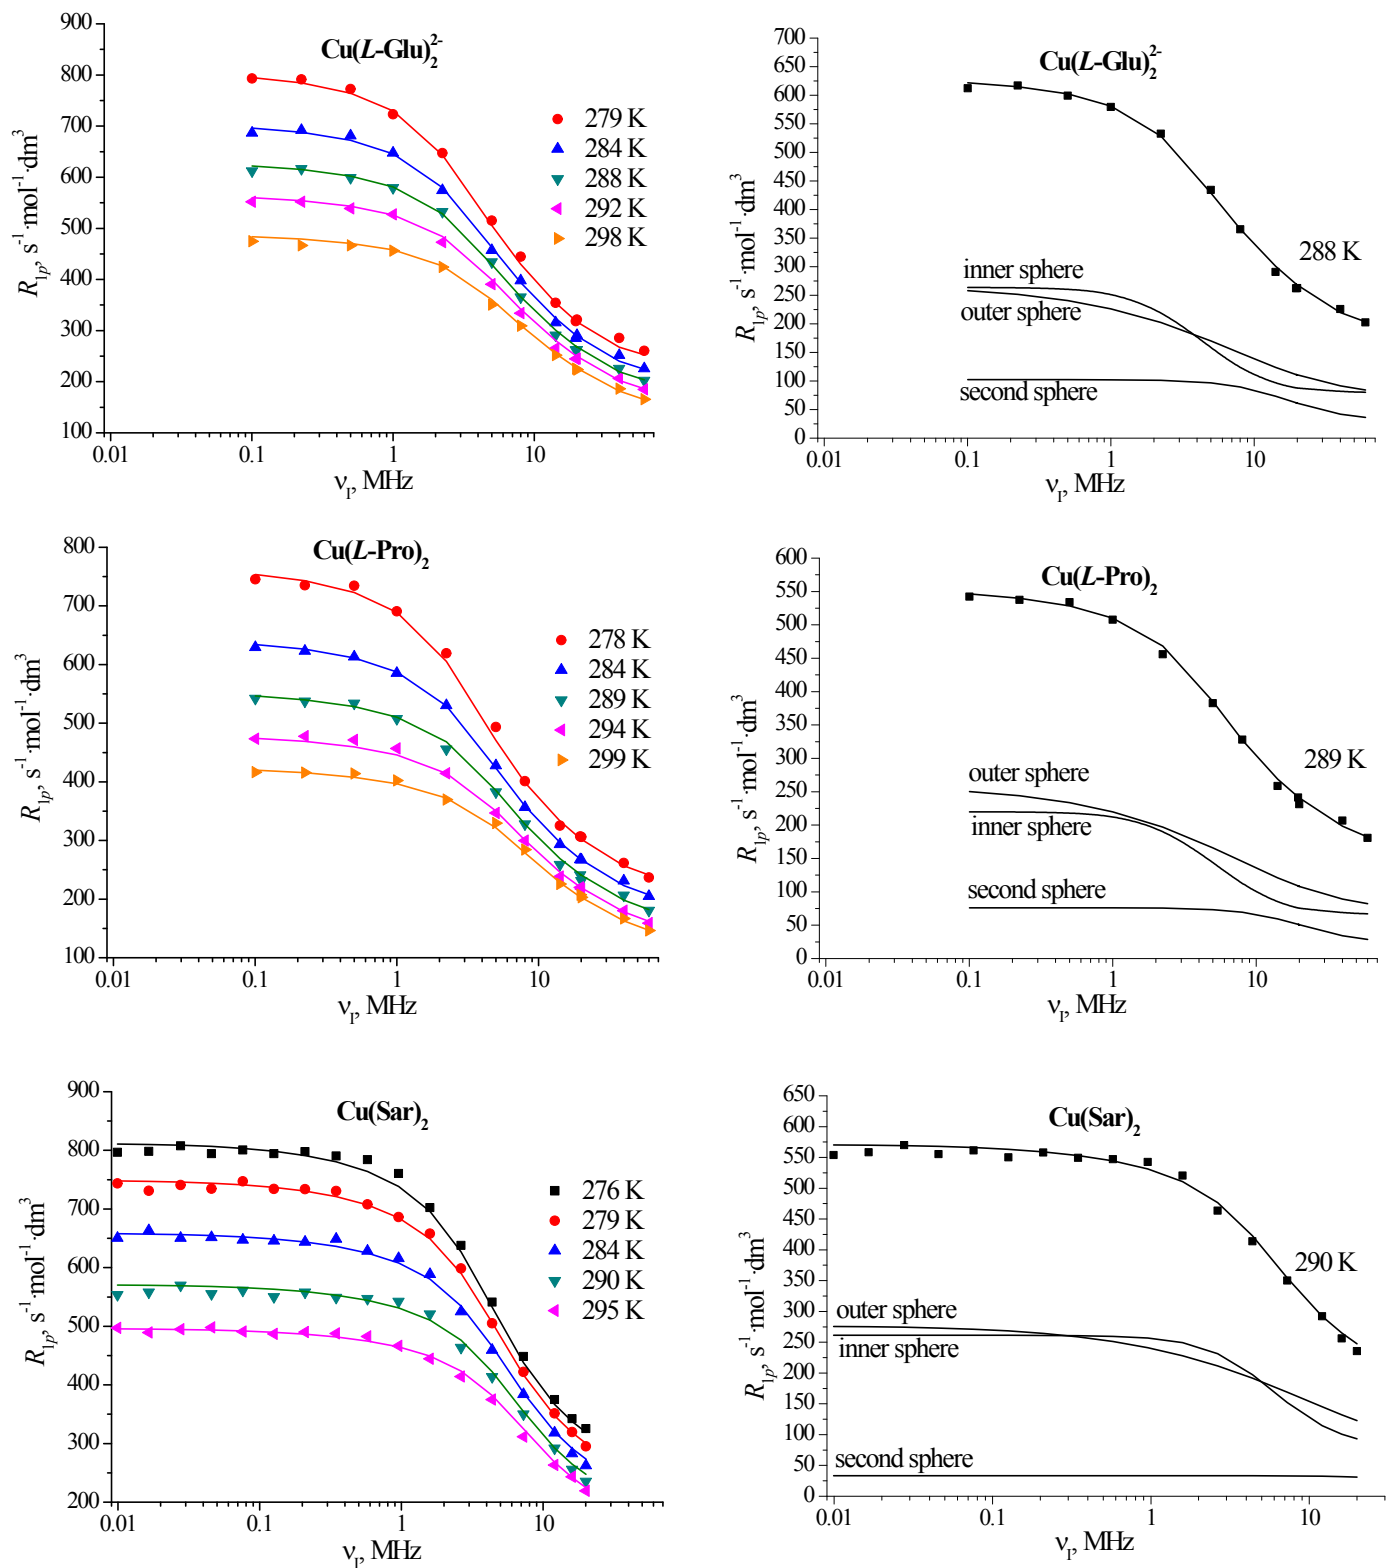

**Fig. 5S** Left column: experimental NMRD profiles (points) and their best simulations (lines); right column: experimental (points) and fitted (lines) NMRD profiles with different contributions. The abscissa is  $\nu_1 = \omega_1/2\pi$ .  $R_{1p} = T_{1p}^{-1}/C_M$  is the molar relaxivity, where  $C_M$  is the metal concentration.

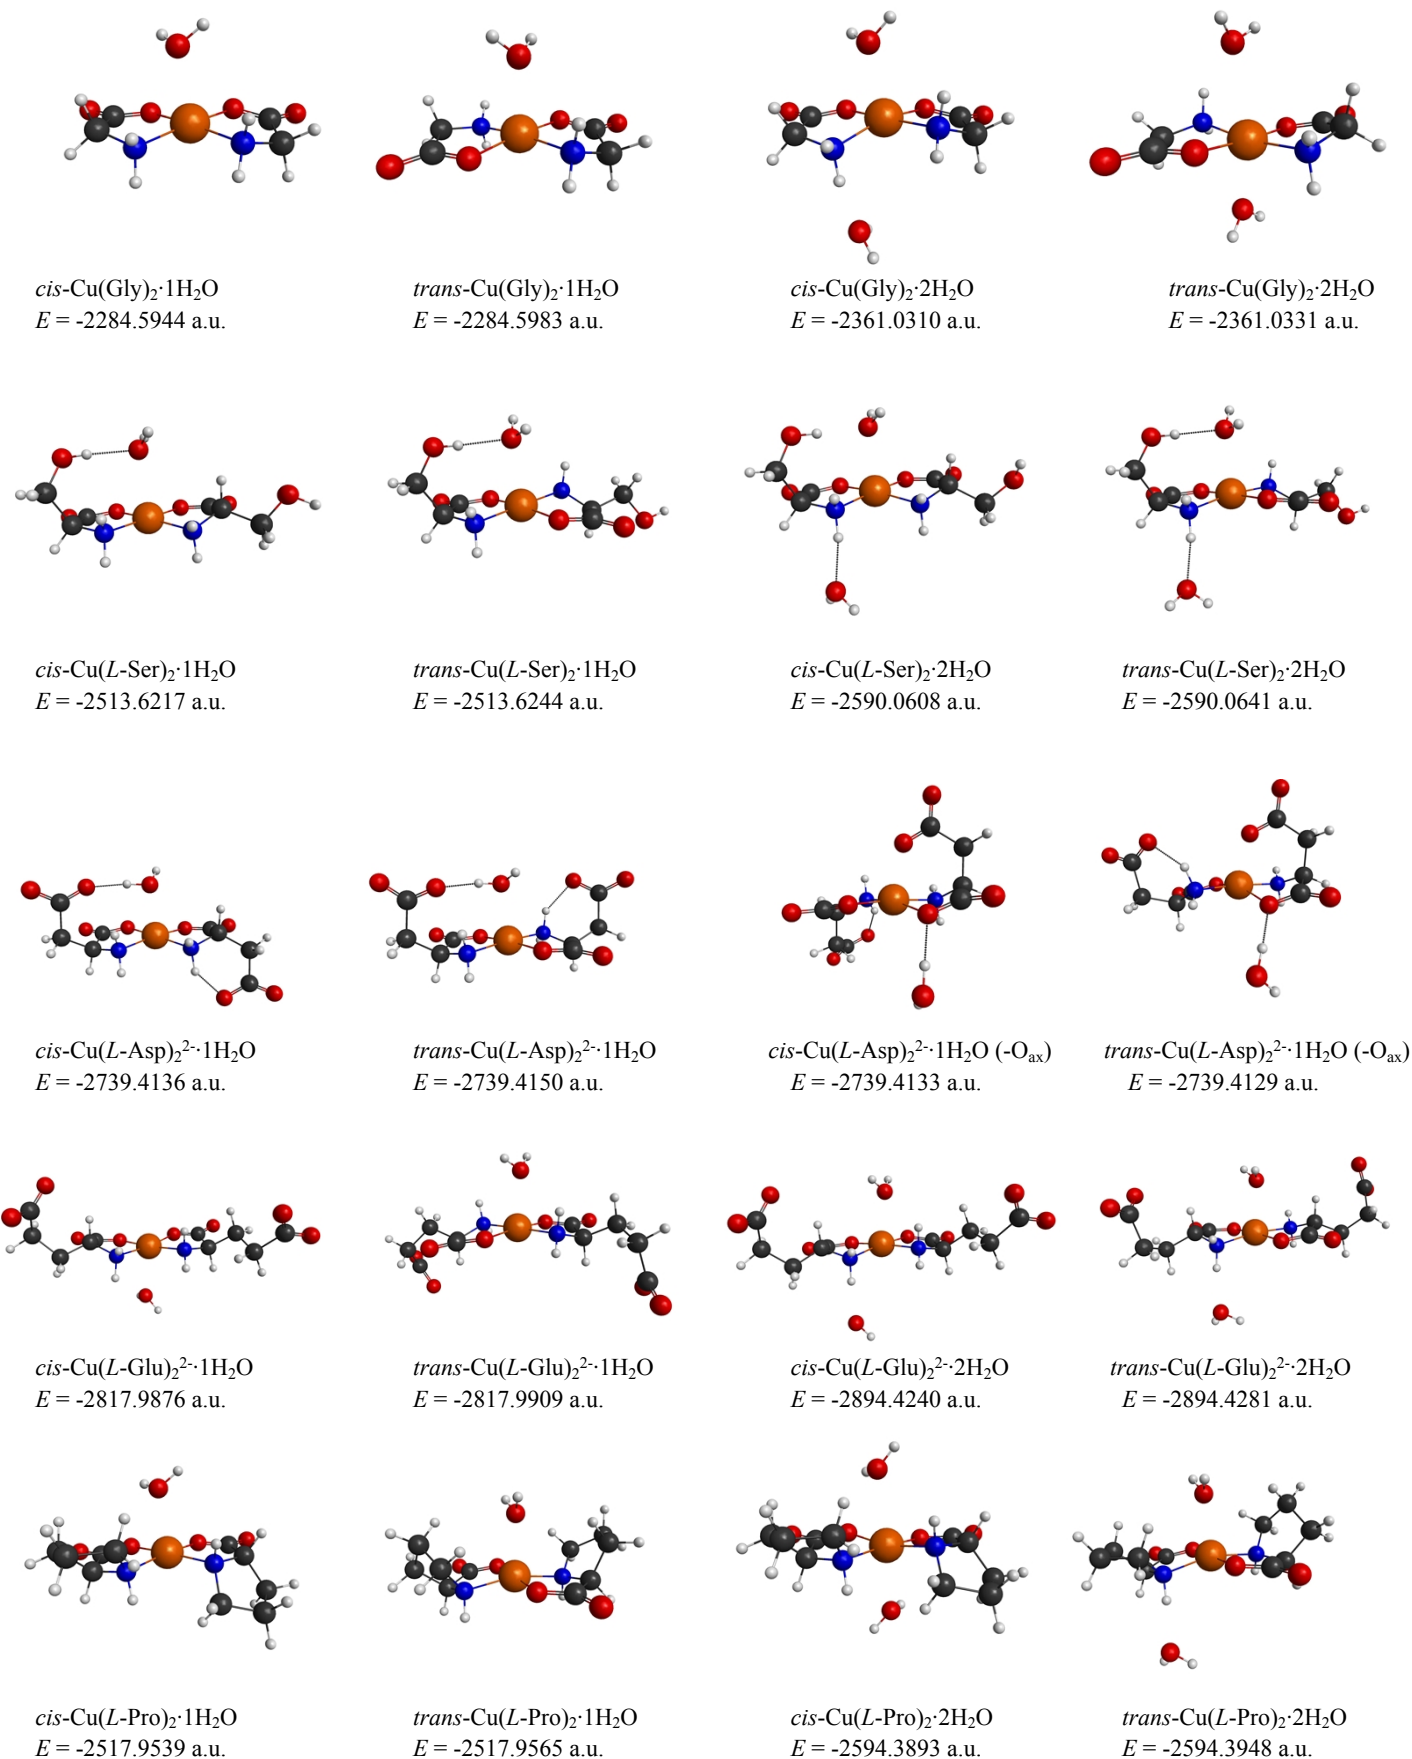

**Fig. 6S** Structures of some copper(II) *bis*-complexes with amino acids optimized in GAMESS program package at B3LYP/TZVP level using C-PCM model to account solvent effects.

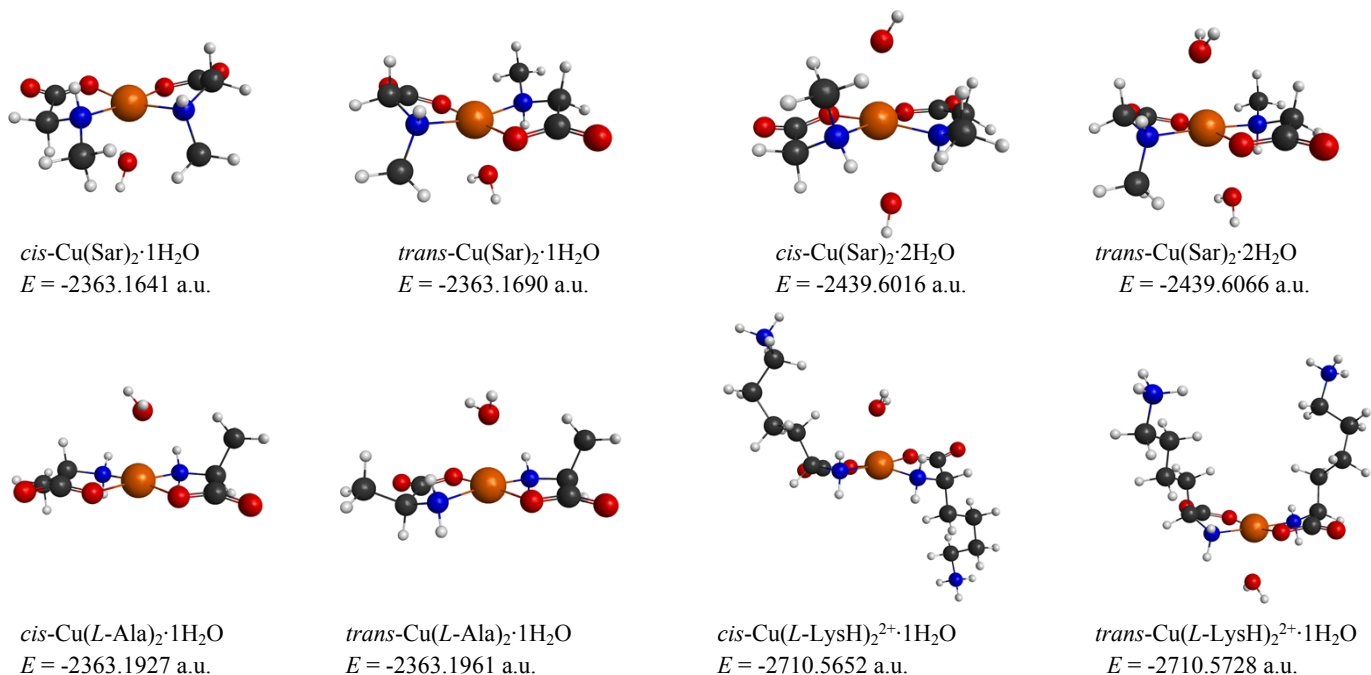

**Fig. 6S (continuation)** Structures of some copper(II) *bis*-complexes with amino acids optimized in GAMESS program package at B3LYP/TZVP level using C-PCM model to account solvent effects.

**Table 2S** Distances between copper(II) and water molecules in optimized structures ( $r_{O1w}$ ,  $r_{O2w}$ ) and electric dipole moments of complexes ( $D$ )

| Complex                                                                                   | $r_{O1w} / \text{\AA}$ | $r_{O2w} / \text{\AA}$ | $D / \text{Debye}$ |
|-------------------------------------------------------------------------------------------|------------------------|------------------------|--------------------|
| <i>cis</i> -Cu(Gly) <sub>2</sub> ·1H <sub>2</sub> O                                       | 2.48                   |                        | 0.88               |
| <i>trans</i> - Cu(Gly) <sub>2</sub> ·1H <sub>2</sub> O                                    | 2.43                   |                        | 0.13               |
| <i>cis</i> -Cu(Gly) <sub>2</sub> ·2H <sub>2</sub> O                                       | 2.44                   | 3.77                   | 0.78               |
| <i>trans</i> - Cu(Gly) <sub>2</sub> ·2H <sub>2</sub> O                                    | 2.46                   | 2.99                   | 0.10               |
| <i>cis</i> -Cu(L-Ser) <sub>2</sub> ·1H <sub>2</sub> O                                     | 2.72                   |                        | 1.00               |
| <i>trans</i> - Cu(L-Ser) <sub>2</sub> ·1H <sub>2</sub> O                                  | 2.62                   |                        | 0.19               |
| <i>cis</i> -Cu(L-Ser) <sub>2</sub> ·2H <sub>2</sub> O                                     | 2.62                   | 4.13                   | 0.98               |
| <i>trans</i> - Cu(L-Ser) <sub>2</sub> ·2H <sub>2</sub> O                                  | 2.62                   | 4.14                   | 0.24               |
| <i>cis</i> -Cu(L-Asp) <sub>2</sub> <sup>2-</sup> ·1H <sub>2</sub> O                       | 2.47                   |                        | 0.45*              |
| <i>trans</i> -Cu(L-Asp) <sub>2</sub> <sup>2-</sup> ·1H <sub>2</sub> O                     | 2.43                   |                        | 0.75*              |
| <i>cis</i> -Cu(L-Asp) <sub>2</sub> <sup>2-</sup> ·1H <sub>2</sub> O (-O <sub>ax</sub> )   | 4.14                   |                        | 0.57*              |
| <i>trans</i> -Cu(L-Asp) <sub>2</sub> <sup>2-</sup> ·1H <sub>2</sub> O (-O <sub>ax</sub> ) | 4.30                   |                        | 0.89*              |
| <i>cis</i> -Cu(L-Glu) <sub>2</sub> <sup>2-</sup> ·1H <sub>2</sub> O                       | 2.54                   |                        | 0.76*              |
| <i>trans</i> -Cu(L-Glu) <sub>2</sub> <sup>2-</sup> ·1H <sub>2</sub> O                     | 2.51                   |                        | 0.91*              |
| <i>cis</i> -Cu(L-Glu) <sub>2</sub> <sup>2-</sup> ·2H <sub>2</sub> O                       | 2.55                   | 3.91                   | 0.60*              |
| <i>trans</i> -Cu(L-Glu) <sub>2</sub> <sup>2-</sup> ·2H <sub>2</sub> O                     | 2.47                   | 4.03                   | 0.59*              |
| <i>cis</i> -Cu(L-Pro) <sub>2</sub> ·1H <sub>2</sub> O                                     | 2.48                   |                        | 0.81               |
| <i>trans</i> -Cu(L- Pro) <sub>2</sub> ·1H <sub>2</sub> O                                  | 2.43                   |                        | 0.07               |
| <i>cis</i> -Cu(L- Pro) <sub>2</sub> ·2H <sub>2</sub> O                                    | 2.55                   | 2.75                   | 0.70               |
| <i>trans</i> -Cu(L- Pro) <sub>2</sub> ·2H <sub>2</sub> O                                  | 2.43                   | 4.09                   | 0.09               |
| <i>cis</i> -Cu(Sar) <sub>2</sub> ·1H <sub>2</sub> O                                       | 2.46                   |                        | 0.89               |
| <i>trans</i> -Cu(Sar) <sub>2</sub> ·1H <sub>2</sub> O                                     | 2.45                   |                        | 0.06               |
| <i>cis</i> -Cu(Sar) <sub>2</sub> ·2H <sub>2</sub> O                                       | 2.55                   | 2.85                   | 0.83               |
| <i>trans</i> -Cu(Sar) <sub>2</sub> ·2H <sub>2</sub> O                                     | 2.52                   | 3.11                   | 0.05               |
| <i>cis</i> -Cu(L-Ala) <sub>2</sub> ·1H <sub>2</sub> O                                     | 2.54                   |                        | 0.91               |
| <i>trans</i> - Cu(L-Ala) <sub>2</sub> ·1H <sub>2</sub> O                                  | 2.46                   |                        | 0.05               |
| <i>cis</i> -Cu(L-LysH) <sub>2</sub> <sup>2+</sup> ·1H <sub>2</sub> O                      | 2.48                   |                        | 0.78*              |
| <i>trans</i> -Cu(L-LysH) <sub>2</sub> <sup>2+</sup> ·1H <sub>2</sub> O                    | 2.44                   |                        | 1.37*              |

\* In the case of Cu(L-Asp)<sub>2</sub><sup>2-</sup>, Cu(L-Glu)<sub>2</sub><sup>2-</sup>, and Cu(L-LysH)<sub>2</sub><sup>2+</sup> the calculated dipole moments are depend on arrangement of uncoordinated charged groups of ligands. So their exact calculations in this model (with only 1 or 2 H<sub>2</sub>O) were not possible.

**Table 3S** Atomic coordinates for the Cu(Gly)<sub>2</sub>·44H<sub>2</sub>O complex optimized at the PBE/L2 level  
(L2 basis set: H {8s4p2d}/[3s2p1d]; C, N, O {12s8p4d2f}/[4s3p2d1f]; Cu {23s18p13d2f}/[6s5p3d1f])

| Atom | x / Å       | y / Å       | z / Å       |
|------|-------------|-------------|-------------|
| Cu   | 6.47646750  | 0.98078498  | -0.64326375 |
| N    | 6.79481377  | 2.56017559  | -1.88098785 |
| H    | 7.10954725  | 2.20925236  | -2.79821376 |
| C    | 7.80309834  | 3.44688593  | -1.26445331 |
| H    | 8.75970783  | 3.33909615  | -1.79367457 |
| H    | 7.49866529  | 4.50244121  | -1.31374714 |
| C    | 8.07952777  | 3.06857409  | 0.19060637  |
| O    | 8.79671867  | 3.82065840  | 0.90468325  |
| O    | 7.59824692  | 1.96604657  | 0.61391590  |
| O    | 7.27344112  | -0.24903912 | 3.03507443  |
| H    | 6.42656601  | -0.00687736 | 3.49651386  |
| H    | 7.03270276  | -0.40128431 | 2.08706296  |
| C    | 5.07736539  | -1.45587088 | -1.18114355 |
| N    | 5.56427505  | -0.28103610 | -1.92429637 |
| H    | 5.03178953  | -2.35763453 | -1.80598228 |
| H    | 4.06397139  | -1.26193684 | -0.79800121 |
| C    | 5.97576013  | -1.70329695 | 0.03426314  |
| O    | 6.03756891  | -2.83945059 | 0.56729041  |
| O    | 6.61935774  | -0.68187538 | 0.46006943  |
| H    | 6.39576034  | -0.58816336 | -2.45932065 |
| H    | 4.86999026  | 0.13748546  | -2.56639549 |
| O    | 4.49866869  | 1.86529955  | 0.44653495  |
| H    | 4.72708508  | 2.41187943  | 1.24656344  |
| H    | 3.73093016  | 1.28185654  | 0.67871871  |
| H    | 5.89471732  | 3.05828155  | -1.97689069 |
| O    | 8.94715911  | 1.83020697  | 3.37553068  |
| H    | 8.32020818  | 1.09940001  | 3.09661581  |
| H    | 8.86537988  | 2.50296698  | 2.66579313  |
| O    | 2.28523524  | 0.23429659  | 0.83714891  |
| H    | 2.38797444  | -0.70849545 | 1.16178009  |
| H    | 1.84649595  | 0.18998985  | -0.04721997 |
| O    | 6.19056689  | -3.57127168 | 3.34227869  |
| H    | 7.06142001  | -3.37717332 | 3.72929790  |
| H    | 6.26192960  | -3.26670775 | 2.41086134  |
| O    | 9.21868343  | -2.20656239 | 3.22079007  |
| H    | 8.46885801  | -1.56304465 | 3.25965047  |
| H    | 9.98803425  | -1.59436295 | 3.05279299  |
| O    | 11.42111736 | 2.98116761  | -0.24580455 |
| H    | 11.26755811 | 2.03425371  | -0.04737463 |
| H    | 10.66307343 | 3.43870592  | 0.16871750  |
| O    | 5.08455315  | 5.92192214  | 0.46986623  |
| H    | 6.07031627  | 6.11630412  | 0.52170951  |
| H    | 4.64328960  | 6.75460768  | 0.69737032  |
| O    | 4.22201075  | 3.88754649  | -1.33261136 |
| H    | 4.40360569  | 4.71139786  | -0.82546259 |
| H    | 4.21654205  | 3.16675838  | -0.64097268 |
| O    | 1.15416283  | 0.33611889  | -1.72608345 |
| H    | 1.45970618  | -0.24380588 | -2.47730434 |
| H    | 0.18630529  | 0.27380852  | -1.73341504 |
| O    | 3.30906742  | 2.42889175  | 4.06736779  |
| H    | 2.42115603  | 2.10382125  | 3.76269538  |
| H    | 3.64793896  | 2.97477967  | 3.31839808  |
| O    | 4.90911873  | 3.79627540  | 2.29721040  |
| H    | 5.35496678  | 4.00843368  | 3.17038987  |
| H    | 4.89895361  | 4.62758113  | 1.76757687  |
| O    | 9.90218263  | -2.17916338 | -0.80020130 |
| H    | 10.30906259 | -2.78043662 | -1.48194743 |
| H    | 9.55116310  | -2.77466876 | -0.05966999 |
| O    | 8.10567793  | -1.32249624 | -2.54008802 |



|   |             |             |             |
|---|-------------|-------------|-------------|
| H | 8.63052225  | -1.71607884 | -1.77597942 |
| H | 8.60297095  | -0.44525851 | -2.63002806 |
| O | 3.89573867  | 1.08050685  | -4.00435946 |
| H | 3.29894677  | 1.80031011  | -3.62061273 |
| H | 3.26208949  | 0.35190821  | -4.20546773 |
| O | 5.10998377  | 0.47924363  | 4.55049321  |
| H | 5.73782760  | 0.90599785  | 5.17023684  |
| H | 4.43900575  | 1.19517034  | 4.32915720  |
| O | 8.85120743  | -3.70448655 | 1.06350736  |
| H | 9.02808277  | -3.17540332 | 1.91536254  |
| H | 7.89866994  | -3.56792518 | 0.88786791  |
| O | 9.43216084  | 0.92649980  | -2.30772253 |
| H | 10.13607188 | 0.73973492  | -1.64079378 |
| H | 9.87712020  | 1.29738214  | -3.11618740 |
| O | 2.57063190  | -2.26451999 | 1.83190542  |
| H | 3.17623472  | -2.17058978 | 2.66985704  |
| H | 1.73369753  | -2.59943727 | 2.19170288  |
| O | 4.00723340  | -2.08223648 | 3.97340572  |
| H | 4.82663965  | -2.63900392 | 3.85602039  |
| H | 4.34509928  | -1.20037968 | 4.25553203  |
| O | 3.66237335  | -3.02950173 | -4.34247186 |
| H | 3.90486402  | -3.67744024 | -3.62765570 |
| H | 4.48992893  | -2.79872215 | -4.81662021 |
| O | 2.06059332  | -1.03333233 | -3.93636747 |
| H | 2.67967401  | -1.84287435 | -4.03278555 |
| H | 1.40775840  | -1.13202117 | -4.64660389 |
| O | 4.33138788  | -4.81863066 | -2.37061448 |
| H | 4.00917940  | -5.71049558 | -2.57596488 |
| H | 3.99990025  | -4.62495822 | -1.43047100 |
| O | 3.79397152  | -4.33125135 | 0.14959755  |
| H | 3.19158337  | -3.70258679 | 0.60472214  |
| H | 4.68023559  | -3.93220040 | 0.34283326  |
| O | 11.24983637 | 0.08442341  | -0.26727624 |
| H | 10.77641714 | -0.79114127 | -0.38528547 |
| H | 12.07625980 | -0.01032296 | -0.80808921 |
| O | 7.71727795  | 6.30908859  | 0.75069078  |
| H | 8.24448267  | 6.83586192  | 0.13136972  |
| H | 8.20698801  | 5.44317557  | 0.84211261  |
| O | 0.97518105  | 1.45176095  | 2.96001083  |
| H | 1.37283692  | 1.00334832  | 2.16854486  |
| H | 0.62671892  | 0.72741082  | 3.50241584  |
| O | 8.20922329  | -3.29924928 | -4.25184971 |
| H | 7.40151614  | -3.30616442 | -4.81224005 |
| H | 8.08553193  | -2.54802634 | -3.58545619 |
| O | 9.59121285  | -5.63408262 | -1.08265159 |
| H | 8.68744540  | -5.67440395 | -1.48775181 |
| H | 9.44958557  | -5.16913432 | -0.23204400 |
| O | 10.70535020 | -3.89254803 | -2.79838417 |
| H | 10.42825821 | -4.64356308 | -2.18121255 |
| H | 9.97108174  | -3.84813951 | -3.44366633 |
| O | 7.68138470  | 1.42838111  | -4.66859819 |
| H | 6.96382052  | 1.83028364  | -5.23941867 |
| H | 8.52238831  | 1.92397307  | -4.79269087 |
| O | 5.44972398  | 2.10355417  | -5.97910416 |
| H | 5.18014082  | 3.02832268  | -6.08675502 |
| H | 4.81623082  | 1.73171717  | -5.29918844 |
| O | 10.43437713 | 2.06974491  | -4.58532871 |
| H | 11.19805198 | 2.41521142  | -4.02130894 |
| H | 10.80423292 | 1.31835691  | -5.10005468 |
| O | 8.29370035  | -0.90591047 | -5.90291343 |
| H | 8.04172187  | -0.07452530 | -5.39115814 |
| H | 8.48099368  | -1.59870545 | -5.22958578 |
| O | 12.46298164 | -1.88056321 | -3.86926666 |

|   |             |             |             |
|---|-------------|-------------|-------------|
| H | 11.95070477 | -2.62941091 | -3.48773092 |
| H | 11.88976448 | -1.47881574 | -4.55867085 |
| O | 11.00304574 | -0.40385608 | -5.90489363 |
| H | 11.44308268 | -0.44777950 | -6.76804662 |
| H | 10.04230274 | -0.60227170 | -6.08005568 |
| O | 11.03322613 | -0.17195362 | 2.69240927  |
| H | 11.19605388 | -0.05542072 | 1.73188168  |
| H | 10.47600788 | 0.59833489  | 2.94009829  |
| O | 7.24248402  | -5.47963880 | -2.58000218 |
| H | 7.55654835  | -4.76456145 | -3.17545043 |
| H | 6.32924099  | -5.21638987 | -2.34277426 |
| O | 12.38257344 | 2.69342393  | -2.87025524 |
| H | 12.78907472 | 1.81359468  | -2.69986199 |
| H | 12.00675806 | 2.94018537  | -1.98758649 |
| O | 13.23341838 | 0.01103984  | -2.18149157 |
| H | 14.16721633 | -0.16067216 | -1.98489602 |
| H | 12.95152851 | -0.72540688 | -2.81807181 |
| O | 6.03365970  | -2.55108574 | -5.94542268 |
| H | 5.91128032  | -2.98416679 | -6.80486690 |
| H | 6.67118846  | -1.80886974 | -6.11727539 |
| O | 2.22900059  | 2.84939312  | -2.89667421 |
| H | 2.82607180  | 3.36492249  | -2.29437015 |
| H | 1.77836344  | 2.19903136  | -2.32012418 |
| O | 7.33059066  | 2.18831184  | 5.50232962  |
| H | 7.99805249  | 2.12984354  | 4.74945918  |
| H | 7.86263254  | 2.23571774  | 6.31147209  |
| O | 5.60689938  | 4.23189761  | 4.84820541  |
| H | 4.75351952  | 3.85693065  | 5.13368219  |
| H | 6.27315562  | 3.55982088  | 5.14800963  |

**Table 4S** Atomic coordinates for the *cis*-Cu(Gly)<sub>2</sub>·H<sub>2</sub>O structure optimized at the B3LYP/TZVP level using C-PCM model

| Atom | x / Å         | y / Å         | z / Å         |
|------|---------------|---------------|---------------|
| Cu   | 6.5057009867  | 0.5627768302  | 0.3076671575  |
| N    | 8.3283680746  | 1.1693522443  | -0.4151607084 |
| H    | 8.9114788593  | 0.3508898163  | -0.5679763296 |
| C    | 8.9528484455  | 2.0642178728  | 0.5928805826  |
| H    | 10.0307768383 | 1.9156021433  | 0.6492488314  |
| H    | 8.7775837311  | 3.1000718067  | 0.2998824307  |
| C    | 8.3305330706  | 1.8677237113  | 1.9810092786  |
| O    | 8.8840453068  | 2.3644801844  | 2.9641977328  |
| O    | 7.2219594037  | 1.2101486693  | 2.0180920342  |
| C    | 4.6882892732  | -1.2712065538 | -0.9929263696 |
| N    | 5.7787970312  | -0.3395112324 | -1.3819927277 |
| H    | 5.0678748349  | -2.2930739432 | -1.0102951477 |
| H    | 3.8523859210  | -1.2199584778 | -1.6903923177 |
| C    | 4.1820659139  | -0.9899506815 | 0.4254591617  |
| O    | 3.1644630405  | -1.5663665592 | 0.8171360945  |
| O    | 4.8796706091  | -0.1697311996 | 1.1336008243  |
| H    | 6.4960046145  | -0.8349312840 | -1.9012933524 |
| H    | 5.4228165197  | 0.3790689620  | -2.0059042040 |
| O    | 5.5775909809  | 2.8241228259  | -0.1105035640 |
| H    | 4.6689481363  | 2.9486342876  | -0.4097160613 |
| H    | 5.6225725900  | 3.2813917549  | 0.7379267019  |
| H    | 8.2532258182  | 1.6402488226  | -1.3119400477 |

**Table 5S** Atomic coordinates for the *trans*-Cu(Gly)<sub>2</sub>·1H<sub>2</sub>O structure optimized at the B3LYP/TZVP level using C-PCM model

| Atom | x / Å        | y / Å         | z / Å         |
|------|--------------|---------------|---------------|
| Cu   | 4.8526688037 | 0.2100747857  | 0.8406303127  |
| N    | 5.0800297677 | 0.5104572811  | 2.8435795538  |
| C    | 3.6729776690 | -1.1675407927 | -1.3948441482 |
| N    | 4.8304225908 | -0.2762227321 | -1.1422314973 |
| H    | 3.9115986197 | -1.9518477106 | -2.1132884445 |
| H    | 2.8544767741 | -0.5800891804 | -1.8128747656 |
| C    | 3.1623459055 | -1.8050985305 | -0.0953784672 |
| O    | 2.3517591216 | -2.7310850341 | -0.1581142290 |
| O    | 3.6041740469 | -1.2931818268 | 1.0044060195  |
| H    | 5.7017043633 | -0.7638587972 | -1.3316055506 |
| H    | 4.8168534711 | 0.5357976459  | -1.7510211971 |
| O    | 3.1748224461 | 1.9700251247  | 0.7639878119  |
| H    | 3.4404041895 | 2.8065519134  | 0.3647351430  |
| H    | 2.2393637363 | 1.8608821619  | 0.5586897683  |
| H    | 4.2860466175 | 1.0925438802  | 3.0960423443  |
| H    | 5.0133029728 | -0.3391832835 | 3.3939700440  |
| C    | 6.3545258315 | 1.2253174863  | 3.0813861432  |
| C    | 6.8493348482 | 1.9175515965  | 1.8045929963  |
| O    | 6.2722791204 | 1.5666382522  | 0.7046535394  |
| O    | 7.7674936006 | 2.7368795216  | 1.8814780069  |
| H    | 6.2718851581 | 1.9561828149  | 3.8853529613  |
| H    | 7.1155303457 | 0.5012054236  | 3.3758536549  |

**Table 6S** Atomic coordinates for the *cis*-Cu(Gly)<sub>2</sub>·2H<sub>2</sub>O structure optimized at the B3LYP/TZVP level using C-PCM model

| Atom | x / Å         | y / Å         | z / Å         |
|------|---------------|---------------|---------------|
| Cu   | -0.3977358775 | 0.2538934320  | 0.0343404709  |
| N    | 1.5849487461  | 0.3892316841  | -0.4025477697 |
| H    | 1.9397503880  | -0.5546060071 | -0.2169840348 |
| C    | 2.2111313501  | 1.3722828885  | 0.5104338004  |
| H    | 3.2151652372  | 1.0674653705  | 0.8073852889  |
| H    | 2.2956293828  | 2.3333968425  | 0.0009631523  |
| C    | 1.3502390035  | 1.5864319335  | 1.7615979869  |
| O    | 1.8166847604  | 2.2056418297  | 2.7212664893  |
| O    | 0.1488044077  | 1.1171276881  | 1.7153140353  |
| O    | 2.2713003578  | -2.3807417410 | 0.3685141316  |
| H    | 1.9738801285  | -2.7644454493 | 1.2011819233  |
| H    | 2.4022138006  | -3.1241268425 | -0.2309436585 |
| C    | -2.2092615037 | -1.6281553113 | -1.2218100694 |
| N    | -1.1146529816 | -0.7118849682 | -1.6325312184 |
| H    | -1.8114718839 | -2.6406005632 | -1.1422440633 |
| H    | -3.0151467830 | -1.6470348309 | -1.9557584751 |
| C    | -2.7729880860 | -1.2447248596 | 0.1503956292  |
| O    | -3.8058381506 | -1.7923254982 | 0.5457583256  |
| O    | -2.0955035349 | -0.3785692121 | 0.8198300786  |
| H    | -0.4193752992 | -1.2163280212 | -2.1716017462 |
| H    | -1.4763874550 | 0.0121038416  | -2.2471005632 |
| O    | -1.0150893882 | 2.4653437584  | -0.8025535903 |
| H    | -1.8157978501 | 2.6999684394  | -1.2866682285 |
| H    | -0.9967712629 | 3.0569862856  | -0.0411316023 |
| H    | 1.7807021991  | 0.6079154831  | -1.3739544130 |

**Table 7S** Atomic coordinates for the *trans*-Cu(Gly)<sub>2</sub>·2H<sub>2</sub>O structure optimized at the B3LYP/TZVP level using C-PCM model

| Atom | x / Å         | y / Å         | z / Å         |
|------|---------------|---------------|---------------|
| Cu   | 0.1365438763  | -0.1409301973 | -0.1025088699 |
| N    | 0.0696799217  | 0.4242123545  | 1.8495175281  |
| O    | 1.9092395864  | -1.7952591139 | 0.3019437340  |
| H    | 1.7648436886  | -2.7482687726 | 0.3280396785  |
| H    | 2.8110482263  | -1.6716689873 | -0.0149130714 |
| C    | -1.3564648110 | -1.1729757823 | -2.3317154718 |
| N    | -0.0594313196 | -0.4919604371 | -2.1033720343 |
| H    | -1.2996822924 | -1.9024870861 | -3.1390174945 |
| H    | -2.0995906149 | -0.4259208113 | -2.6149695093 |
| C    | -1.8598847502 | -1.8561129188 | -1.0522995763 |
| O    | -2.7839867717 | -2.6708062382 | -1.1319475052 |
| O    | -1.2883622456 | -1.5006771090 | 0.0455767171  |
| H    | 0.7122301718  | -1.1010985247 | -2.3616399183 |
| H    | 0.0260424086  | 0.3432492112  | -2.6739819580 |
| O    | -1.9831764648 | 1.9211236120  | 0.3093840433  |
| H    | -1.9437373681 | 2.8013048549  | -0.0824891755 |
| H    | -2.9005413864 | 1.6405077358  | 0.2136234752  |
| H    | -0.7606475669 | 1.0138897275  | 1.8523241653  |
| H    | -0.0670340937 | -0.3284057962 | 2.5149705125  |
| C    | 1.2859915287  | 1.2081912328  | 2.1468992732  |
| C    | 1.9123267312  | 1.7756467414  | 0.8654894474  |
| O    | 1.4788302820  | 1.2877308335  | -0.2467881139 |
| O    | 2.8000940114  | 2.6285803648  | 0.9543790189  |
| H    | 1.0931279762  | 2.0234885557  | 2.8456778473  |
| H    | 2.0271412760  | 0.5499465508  | 2.6029172576  |
